# Supplementary material
Source: PubMed Central journal article supplement (PMC7239618)
Supplement: mmc1.pdf [file mmc1.pdf]

# THE LANCET

## Rheumatology

### Supplementary appendix

This appendix formed part of the original submission and has been peer reviewed. We post it as supplied by the authors.

Supplement to: Zhong J, Tang J, Ye C, Dong L. The immunology of COVID-19: is immune modulation an option for treatment? *Lancet Rheumatol* 2020; published online May 20. [https://doi.org/10.1016/S2665-9913\(20\)30120-X](https://doi.org/10.1016/S2665-9913(20)30120-X).

## Supplementary appendix

| No.      | Supplementary Table                                                | Page |
|----------|--------------------------------------------------------------------|------|
| Table S1 | Ongoing registered trials of immunomodulation therapy for COVID-19 | 1    |

**Supplementary Table S1 Ongoing registered trials of immunomodulation therapy for COVID-19**

| Strategy        | Intervention                                                                                                               | Trial registration #             | Sponsor                                                                                                    | Registration date | Study design                                            |
|-----------------|----------------------------------------------------------------------------------------------------------------------------|----------------------------------|------------------------------------------------------------------------------------------------------------|-------------------|---------------------------------------------------------|
| IL-6 antagonism | Tocilizumab                                                                                                                | <a href="#">ChiCTR2000029765</a> | The First Affiliated Hospital of University of science and technology of China (Anhui Provincial Hospital) | 2020-02-13        | multicenter, randomized controlled trial                |
|                 | Favipiravir + Tocilizumab                                                                                                  | <a href="#">ChiCTR2000030894</a> | Peking University First Hospital                                                                           | 2020-03-16        | Multicenter, Randomized, Controlled                     |
|                 | Favipiravir<br>Tocilizumab<br>tozumab and adamumab                                                                         | <a href="#">ChiCTR2000030580</a> | Shanghai General Hospital                                                                                  | 2020-03-08        | randomized controlled                                   |
|                 | Tocilizumab: 8 mg/kg injection                                                                                             | <a href="#">NCT04317092</a>      | National Cancer Institute, Naples                                                                          | 2020-03-20        | open-label, single-group                                |
|                 | Tocilizumab: 400mg                                                                                                         | <a href="#">NCT04310228</a>      | Peking University First Hospital                                                                           | 2020-03-17        | open-label, randomized                                  |
|                 | Tocilizumab                                                                                                                | <a href="#">NCT04332094</a>      | Fundació Institut de Recerca de l'Hospital de la Santa Creu i Sant Pau                                     | 2020-04-02        | Randomized, Multicenter, Open-label                     |
|                 | Anakinra: 100 mg/d, sc, 28 d<br>Siltuximab: 11 mg/kg, single IV<br>Tocilizumab: 100 mg/d, sc, 28 d<br>Tocilizumab: 8 mg/kg | <a href="#">NCT04330638</a>      | University Hospital, Ghent                                                                                 | 2020-04-01        | randomized, open-label                                  |
|                 | Tocilizumab: 200mg, single dose                                                                                            | <a href="#">NCT04331795</a>      | Università Politecnica delle Marche                                                                        | 2020-03-19        | Open-label, single arm                                  |
|                 | Tocilizumab: 80mg, single dose<br>Tocilizumab 8mg/kg                                                                       | <a href="#">NCT04331808</a>      | University of Chicago                                                                                      | 2020-04-02        | open-label, non-randomized                              |
|                 | Tocilizumab 8mg/kg                                                                                                         | <a href="#">NCT04331808</a>      | Assistance Publique - Hôpitaux de Paris                                                                    | 2020-04-02        | randomized, open-label, controlled                      |
|                 | Tocilizumab: 8 mg/kg, one dose                                                                                             | <a href="#">NCT04320615</a>      | Hoffmann-La Roche                                                                                          | 2020-03-25        | randomized, multicenter, double-blind, controlled trial |
| IL-1 blockade   | Sarilumab: low dose<br>Sarilumab high dose                                                                                 | <a href="#">NCT04315298</a>      | Regeneron Pharmaceuticals                                                                                  | 2020-03-19        | Randomized, Double-Blind, Controlled                    |
|                 | Anakinra<br>Emapalumab                                                                                                     | <a href="#">NCT04324021</a>      | Swedish Orphan Biovitrum                                                                                   | 2020-03-27        | multicenter, randomized, open-label                     |
|                 | Anakinra: 100 mg/d, sc, 28 d                                                                                               | <a href="#">NCT04330638</a>      | University Hospital, Ghent                                                                                 | 2020-04-01        | randomized, open-                                       |

|                                   |                                                                    |                                  |                                                                                        |            |                                                         |
|-----------------------------------|--------------------------------------------------------------------|----------------------------------|----------------------------------------------------------------------------------------|------------|---------------------------------------------------------|
|                                   | Siltuximab: 11 mg/kg, single IV<br>Tocilizumab: 100 mg/d, sc, 28 d |                                  |                                                                                        |            | label                                                   |
| Pyrimidine synthesis inhibitor    | leflunomide                                                        | <a href="#">ChiCTR2000030058</a> | Renmin Hospital of Wuhan University                                                    | 2020-02-22 | multicenter, randomized, double-blind, controlled trial |
| JAK inhibitor                     | Ruxolitinib combined with mesenchymal stem cell                    | <a href="#">ChiCTR2000029580</a> | Tongji Hospital, Tongji Medical College, Huazhong University of Science and Technology | 2020-02-05 | prospective, single-blind, randomized controlled trial  |
|                                   | Ruxolitinib 10 mg twice a day                                      | <a href="#">NCT04334044</a>      | Grupo Cooperativo de Hemopatías Malignas                                               | 2020-04-03 | Open-label, single group                                |
|                                   | Ruxolitinib                                                        | <a href="#">NCT04331665</a>      | University Health Network, Toronto                                                     | 2020-04-02 | Single Arm Open-label                                   |
|                                   | Baricitinib 4 mg/day x 14 days                                     | <a href="#">NCT04320277</a>      | Hospital of Prato                                                                      | 2020-03-24 | open label, non-randomized                              |
|                                   | Tofacitinib 10mg bid x 14 days                                     | <a href="#">NCT04332042</a>      | Università Politecnica delle Marche                                                    | 2020-04-02 | Single Arm Open-label                                   |
| Thalidomide                       | Thalidomide: 100mg, po, qn, for 14 days                            | <a href="#">NCT04273529</a>      | First Affiliated Hospital of Wenzhou Medical University                                | 2020-02-20 | Randomized                                              |
|                                   | Thalidomide: 100mg, po, qn, for 14 days                            | <a href="#">NCT04273581</a>      | First Affiliated Hospital of Wenzhou Medical University                                | 2020-02-18 | Randomized                                              |
| Cloroquine/<br>Hydroxychloroquine | Chloroquine phosphate, Hydroxychloroquine sulfate                  | <a href="#">ChiCTR2000030054</a> | Zhongshan Hospital Affiliated to Xiamen University                                     | 2020-02-22 | prospective, open label, randomized, controlled trial   |
|                                   | hydroxychloroquine                                                 | <a href="#">NCT04333225</a>      | Baylor Research Institute                                                              | 2020-04-03 | open label, non-randomized                              |
|                                   | Hydroxychloroquine 200mg, q12h, 7-10 days                          | <a href="#">NCT04307693</a>      | Asan Medical Center                                                                    | 2020-03-13 | Multicenter, open labelled, randomized                  |
|                                   | Hydroxychloroquine: 400mg/day for 5 day                            | <a href="#">NCT04261517</a>      | Shanghai Public Health Clinical Center                                                 | 2020-02-07 | randomized, open-label                                  |
|                                   | Hydroxychloroquine                                                 | <a href="#">NCT04328467</a>      | University of Minnesota                                                                | 2020-03-31 | randomized                                              |
|                                   | hydroxychloroquine 400 mg bid for 1 day, 200 mg bid for 4 days     | <a href="#">NCT04329832</a>      | Intermountain Health Care, Inc.                                                        | 2020-04-01 | randomized, open-label                                  |
|                                   | azithromycin 500 mg on day 1 plus 250 mg daily on days 2-5         | <a href="#">NCT04329611</a>      | University of Calgary                                                                  | 2020-04-01 | Randomized, Double-blind, controlled                    |
|                                   | hydroxychloroquine 400 mg bid for 1 day, 200 mg bid for 4 days     | <a href="#">NCT04325893</a>      | University Hospital, Angers                                                            | 2020-03-30 | Randomized, Double-blind                                |
|                                   | Hydroxychloroquine                                                 | <a href="#">NCT04329572</a>      | Azidus Brasil                                                                          | 2020-04-01 | open-label, single                                      |

|  |                                                                        |                             |                                                              |            |                                                          |
|--|------------------------------------------------------------------------|-----------------------------|--------------------------------------------------------------|------------|----------------------------------------------------------|
|  | for 1 day, 200 mg bid for 4 days                                       |                             |                                                              |            | group                                                    |
|  | hydroxychloroquine 400 mg bid for 1 day, 200 mg bid for 9 days         | <a href="#">NCT04323631</a> | Rambam Health Care Campus                                    | 2020-03-26 | randomized, open-label                                   |
|  | Hydroxychloroquine + azithromycin                                      | <a href="#">NCT04321278</a> | Hospital Israelita Albert Einstein                           | 2020-03-25 | randomized, open-label                                   |
|  | Hydroxychloroquine 400mg day for 10 days                               | <a href="#">NCT04315896</a> | National Institute of Respiratory Diseases, Mexico           | 2020-03-20 | Double blinded, randomized controlled trial              |
|  | hydroxychloroquine: 300mg weekly                                       | <a href="#">NCT04333732</a> | Washington University School of Medicine                     | 2020-04-03 | multi-site, randomized, double-blinded, controlled trial |
|  | hydroxychloroquine: 300mg twice weekly                                 |                             |                                                              |            |                                                          |
|  | hydroxychloroquine: 150 mg daily                                       |                             |                                                              |            |                                                          |
|  | hydroxychloroquine or chloroquine: 10 mg / kg followed by 155 mg daily | <a href="#">NCT04303507</a> | University of Oxford                                         | 2020-03-11 | randomised, controlled                                   |
|  | hydroxychloroquine 400 mg bid for 1 day, 200 mg bid for 4 days         | <a href="#">NCT04329832</a> | Intermountain Health Care, Inc.                              | 2020-04-01 | randomized, open-label                                   |
|  | Azithromycin 500 mg for 1day, 250 mg for 4 days                        |                             |                                                              |            |                                                          |
|  | Hydroxychloroquine                                                     | <a href="#">NCT04328272</a> | Prof. Dr. Umar Farooq                                        | 2020-03-31 | Single randomized blinded                                |
|  | Hydrochloroquine 400 mg x 3 days, then 200 mg x 11 days                | <a href="#">NCT04328961</a> | University of Washington                                     | 2020-04-01 | Single randomized blinded                                |
|  | Chloroquine                                                            | <a href="#">NCT04328493</a> | Oxford University Clinical Research Unit, Vietnam            | 2020-03-31 | open label, randomized, controlled trial                 |
|  | hydroxychloroquine 400 mg bid for 1 day, 200 mg bid for 4 days         | <a href="#">NCT04332991</a> | Massachusetts General Hospital                               | 2020-04-03 | Randomized                                               |
|  | chloroquine 500 mg bid for 7 days                                      | <a href="#">NCT04333628</a> | HaEmek Medical Center, Israel                                | 2020-04-03 | open label, randomized                                   |
|  | Hydroxychloroquine                                                     | <a href="#">NCT04308668</a> | University of Minnesota                                      | 2020-03-16 | Randomized                                               |
|  | Hydroxychloroquine                                                     | <a href="#">NCT04333654</a> | Sanofi                                                       | 2020-04-03 | Randomized, double-blinded, controlled                   |
|  | Hydroxychloroquine                                                     | <a href="#">NCT04322396</a> | Chronic Obstructive Pulmonary Disease Trial Network, Denmark | 2020-03-26 | Randomized, double-blinded, controlled                   |

|                                                                                                |                                  |                                                                                            |            |                                                       |
|------------------------------------------------------------------------------------------------|----------------------------------|--------------------------------------------------------------------------------------------|------------|-------------------------------------------------------|
| Chloroquine 1.0gx2 days, 0.5gx12 day from the third day, Hydroxychloroquine 0.2g bid x 14 days | <a href="#">ChiCTR2000029992</a> | Zhongshan Hospital Affiliated to Xiamen University                                         | 2020-02-18 | prospective, randomized, open label, controlled trial |
| Hydroxychloroquine: Day1-3: 500mg BID, Day4-10: 250mg BID                                      | <a href="#">ChiCTR2000029899</a> | Peking University Third Hospital                                                           | 2020-02-16 | Randomized, Open-label, Parallel, Controlled Trial    |
| Hydroxychloroquine: Day1-3: 500mg BID, Day4-10: 250mg BID                                      | <a href="#">ChiCTR2000029898</a> | Peking University Third Hospital                                                           | 2020-02-16 | Randomized, Open-label, Parallel, Controlled Trial    |
| Hydroxychloroquine                                                                             | <a href="#">ChiCTR2000029868</a> | Ruijin Hospital, Shanghai Jiaotong University School of Medicine                           | 2020-02-15 | multicenter, randomized controlled trial              |
| Hydroxychloroquine                                                                             | <a href="#">ChiCTR2000029803</a> | Renmin Hospital of Wuhan University                                                        | 2020-02-14 | prospective, randomized, open-label, controlled       |
| Hydroxychloroquine                                                                             | <a href="#">ChiCTR2000029762</a> | The First Affiliated Hospital of Chongqing Medical University                              | 2020-02-12 | randomized, open-label, controlled trial              |
| Hydroxychloroquine: low-, medium-, high-dose                                                   | <a href="#">ChiCTR2000029761</a> | The First Affiliated Hospital of Chongqing Medical University                              | 2020-02-12 | Multicenter, randomized, open-label                   |
| Hydroxychloroquin                                                                              | <a href="#">ChiCTR2000029760</a> | The Second Affiliated Hospital of Chongqing Medical University                             | 2020-02-12 | randomized controlled study                           |
| Hydroxychloroquine: 0.2g twice a day                                                           | <a href="#">ChiCTR2000029740</a> | The First Hospital of Peking University                                                    | 2020-02-11 | randomized open-label controlled                      |
| Hydroxychloroquine: 0.2g oral 2/ day                                                           | <a href="#">ChiCTR2000029559</a> | Renmin Hospital of Wuhan University                                                        | 2020-02-04 | Randomized, double blind, Parallel                    |
| Hydroxychloroquine 0.1g oral 2/ day                                                            |                                  |                                                                                            |            |                                                       |
| phosphoric chloroquine: 2 tablets BID                                                          | <a href="#">ChiCTR2000030031</a> | The Sixth Affiliated Hospital of Guangzhou Medical University (Qingyuan People's Hospital) | 2020-02-21 | randomized, double-blind, parallel, controlled trial  |
| phosphoric chloroquine: 2 tablets BID                                                          | <a href="#">ChiCTR2000029837</a> | Jingzhou Central Hospital                                                                  | 2020-02-15 | randomized, double-blind, parallel, controlled trial  |
| chloroquine                                                                                    | <a href="#">ChiCTR2000031204</a> | Beijing you'an Hospital, Capital Medical University                                        | 2020-03-24 | randomized                                            |
| chloroquine                                                                                    | <a href="#">ChiCTR2000030718</a> | Zhongnan Hospital of Wuhan University                                                      | 2020-03-11 | open label randomized                                 |
| favipiravir plus chloroquine                                                                   | <a href="#">ChiCTR2000030987</a> | Beijing Chao-yang Hospital, Capital Medical                                                | 2020-03-20 | randomized                                            |

|                   |                                                                                |                                  |                                                                                        |            |                                                            |            |
|-------------------|--------------------------------------------------------------------------------|----------------------------------|----------------------------------------------------------------------------------------|------------|------------------------------------------------------------|------------|
|                   | favipiravir                                                                    |                                  |                                                                                        | University |                                                            | controlled |
|                   | phosphoric chloroquine: 2 tablets BID                                          | <a href="#">ChiCTR2000029826</a> | Jingzhou Central Hospital                                                              | 2020-02-14 | randomized, double-blind, parallel, controlled trial       |            |
|                   | Chloroquine Phosphate                                                          | <a href="#">ChiCTR2000029988</a> | Zhongnan Hospital of Wuhan University                                                  | 2020-02-18 | Open label, Parallel                                       |            |
|                   | chloroquine phosphate aerosol inhalation                                       | <a href="#">ChiCTR2000029975</a> | The First Hospital of Jilin University                                                 | 2020-02-18 | Single arm                                                 |            |
|                   | Chloroquine Phosphate                                                          | <a href="#">ChiCTR2000029939</a> | HwaMei Hospital, University of Chinese Academy of Sciences                             | 2020-02-16 | Single-blind, Randomized, Controlled                       |            |
|                   | Chloroquine Phosphate                                                          | <a href="#">ChiCTR2000029935</a> | HwaMei Hospital, University of Chinese Academy of Sciences                             | 2020-02-16 | Single arm                                                 |            |
|                   | Chloroquine Phosphate vs. Lopinavir / Ritonavir                                | <a href="#">ChiCTR2000029741</a> | The Fifth Affiliated Hospital Sun Yat-Sen University                                   | 2020-02-11 | prospective, open-label, multicenter randomized controlled |            |
|                   | chloroquine                                                                    | <a href="#">ChiCTR2000029609</a> | The Fifth Affiliated Hospital of Sun Yat-Sen University                                | 2020-02-06 | prospective, open-label, multiple-center study             |            |
|                   | chloroquine                                                                    | <a href="#">ChiCTR2000029542</a> | Sun Yat sen Memorial Hospital of Sun Yat sen University                                | 2020-02-03 | prospective                                                |            |
| Stem cell therapy | Iv injection of Wharton's Jelly mesenchymal stem cells (1×10 <sup>6</sup> /kg) | <a href="#">ChiCTR2000030088</a> | The Sixth Medical Center of PLA General Hospital                                       | 2020-02-22 | Parallel                                                   |            |
|                   | Mesenchymal stem cell therapy                                                  | <a href="#">ChiCTR2000030020</a> | Second Hospital of University of South China, Hengyang                                 | 2020-02-20 | Sequential                                                 |            |
|                   | mesenchymal stem cell therapy                                                  | <a href="#">ChiCTR2000029990</a> | Institute of Basic Medical Sciences, Chinese Academy of Medical Sciences               | 2020-02-18 | Parallel                                                   |            |
|                   | Human Menstrual Blood-Derived Stem Cells                                       | <a href="#">ChiCTR2000029606</a> | The First Affiliated Hospital, College of Medicine, Zhejiang University                | 2020-02-07 | open label, Parallel                                       |            |
|                   | Ruxolitinib combined with mesenchymal stem cell                                | <a href="#">ChiCTR2000029580</a> | Tongji Hospital, Tongji Medical College, Huazhong University of Science and Technology | 2020-02-05 | prospective, single-blind, randomized controlled trial     |            |
|                   | Cord Blood Mesenchymal Stem Cell                                               | <a href="#">ChiCTR2000029816</a> | Guangzhou reborn health management consultation co., LTD                               | 2020-02-14 | open label, Parallel                                       |            |
|                   | umbilical cord mesenchymal stem cell conditioned medium                        | <a href="#">ChiCTR2000029569</a> | Xiangyang First People's Hospital                                                      | 2020-02-04 | randomized controlled                                      |            |

|                               |                                                        |                                  |                                                                                         |            |                                               |
|-------------------------------|--------------------------------------------------------|----------------------------------|-----------------------------------------------------------------------------------------|------------|-----------------------------------------------|
|                               | mesenchymal stem cells                                 | <a href="#">ChiCTR2000030835</a> | the First Affiliated Hospital of Xinxiang Medical University                            | 2020-03-15 | Non-randomized                                |
|                               | mesenchymal stem cells                                 | <a href="#">ChiCTR2000031430</a> | The Fifth Medical Center of PLA General Hospital                                        | 2020-03-31 | non-randomized controlled                     |
|                               | Dental pulp mesenchymal stem cells                     | <a href="#">ChiCTR2000031319</a> | Renmin Hospital of Wuhan University                                                     | 2020-03-27 | randomized controlled                         |
|                               | mesenchymal stem cells                                 | <a href="#">ChiCTR2000031494</a> | Huangshi Hospital of Traditional Chinese Medicine                                       | 2020-04-02 | randomized controlled                         |
|                               | mesenchymal stem cell                                  | <a href="#">NCT04252118</a>      | Beijing 302 Hospital, China                                                             | 2020-02-05 | open label, non-randomized                    |
|                               | Cord Blood Mesenchymal Stem Cell                       | <a href="#">NCT04269525</a>      | ZhiYong Peng, Zhongnan Hospital                                                         | 2020-02-13 | Open-label, single arm                        |
|                               | Umbilical cord mesenchymal stem cells                  | <a href="#">NCT04273646</a>      | Wuhan Union Hospital, China                                                             | 2020-02-18 | open label, randomized                        |
| Convalescent plasma treatment | Convalescent Plasma                                    | <a href="#">NCT04333355</a>      | Hospital San Jose Tec de Monterrey                                                      | 2020-04-03 | Open-label, single group                      |
|                               | Convalescent Plasma                                    | <a href="#">NCT04327349</a>      | Mazandaran University of Medical Sciences                                               | 2020-03-31 | Open-label, single arm                        |
|                               | Immunoglobulin of cured patients                       | <a href="#">ChiCTR2000030841</a> | Union hospital of Tongji Medical College, Huazhong University of Science and Technology | 2020-03-16 | randomized control                            |
|                               | Convalescent Plasma                                    | <a href="#">ChiCTR2000030627</a> | The First Affiliated Hospital of Zhengzhou University                                   | 2020-03-08 | randomized controlled                         |
|                               | infusing convalescent plasma: 200-500ml, two infusions | <a href="#">ChiCTR2000030039</a> | Affiliated Hospital of Xuzhou Medical University                                        | 2020-02-13 | Multi-center, non randomized control          |
|                               | anti-2019-nCoV inactivated convalescent plasma         | <a href="#">ChiCTR2000030046</a> | First People's Hospital of Jiangxia District, Wuhan (Union Jiangnan Hospital)           | 2020-02-21 | Multi-center, single arm trial                |
|                               | anti-SARS-CoV-2 virus inactivated plasma               | <a href="#">ChiCTR2000030010</a> | Wuhan Jinyintan Hospital (Wuhan Infectious Diseases Hospital)                           | 2020-02-19 | randomized, double-blind, parallel-controlled |
|                               | convalescent plasma treatment                          | <a href="#">ChiCTR2000029850</a> | The First Affiliated Hospital of Zhejiang University School of Medicine                 | 2020-02-15 | Single center, Non randomized control         |
|                               | Convalescent plasma                                    | <a href="#">ChiCTR2000029757</a> | Institute of Blood Transfusion, Chinese Academy of Medical Sciences                     | 2020-02-12 | prospective randomized controlled trial       |
| Glucocorticoid                | Methylprednisolone 250mg/24h                           | <a href="#">NCT04329650</a>      | Judit Pich Martinez                                                                     | 2020-04-01 | Randomized, open-label                        |
|                               | Dexamethasone                                          | <a href="#">NCT04325061</a>      | Dr. Negrin University Hospital                                                          | 2020-03-27 | randomized, controlled, open-label trial      |



|                                                 |                                  |                                                |            |                            |
|-------------------------------------------------|----------------------------------|------------------------------------------------|------------|----------------------------|
| Methylprednisolone: 80 mg/d                     | <a href="#">NCT04323592</a>      | University of Trieste                          | 2020-03-26 | single arm, non randomized |
| dexamethasone 20mg/d x 5 days + 10mg/d x 5 days | <a href="#">NCT04327401</a>      | Luiz F. L. Reis, Ph.D., Hospital Sirio-Libanes | 2020-03-31 | randomized, open-label     |
| Early corticosteroid                            | <a href="#">ChiCTR2000030481</a> | Zhongnan Hospital of Wuhan University          | 2020-03-03 | randomized control         |
| Middle-late corticosteroid                      |                                  |                                                |            |                            |
| low-dose methylprednisolone                     | <a href="#">ChiCTR2000029656</a> | Wuhan Pulmonary Hospital                       | 2020-02-09 | randomized, open-label     |

*Trials listed are from ChiCtr.org.cn/ and ClinicalTrials.gov/, as of 2020-04-03.*
